# Supplementary material for: Geothermal Fluid Variation Recorded by Banded Ca-Carbonate Veins in a Fault-Related, Fissure Ridge-Type Travertine Depositional System (Iano, southern Tuscany, Italy)
Source: Hindawi journal article supplement (doi:10.1155/2021/8817487), 2021-01-30
Supplement: f1 [file 8817487.f1.zip]

Archive with 2 entries (2 files):
- Table S1_Supplementary material.xlsx
- Table S2_Supplementary material.xlsx
