# Supplementary material for: Geothermal Fluid Variation Recorded by Banded Ca-Carbonate Veins in a Fault-Related, Fissure Ridge-Type Travertine Depositional System (Iano, southern Tuscany, Italy)
Source: Hindawi journal article supplement (doi:10.1155/2021/8817487), 2021-01-30
Supplement: f1 [file 8817487.f1.zip › Table S1_Supplementary material.xlsx]

## Sheet: Foglio1
Standard name	δ13C	δ18O	Δ47
	(‰)	(‰)	(CDES)
ETH1	2.02	-2.19	0.258
ETH2	-10.17	-18.69	0.256
ETH3	1.71	-1.78	0.691
IAEA-C2	-8.25	-9	0.65
