# Supplementary material for: Geothermal Fluid Variation Recorded by Banded Ca-Carbonate Veins in a Fault-Related, Fissure Ridge-Type Travertine Depositional System (Iano, southern Tuscany, Italy)
Source: Hindawi journal article supplement (doi:10.1155/2021/8817487), 2021-01-30
Supplement: f1 [file 8817487.f1.zip › Table S2_Supplementary material.xlsx]

## Sheet: Foglio1
Parameter description	Value
Abundance ratio of 13C/12C for VPDB	0.01118
Abundance ratio of 17O/16O for VSMOW	0.000386672
Abundance ratio of 18O/16O for VSMOW	0.0020052
Factor for converting δ18O VPDB for VMOW	30.92
Terrestrial mass-dependent fractionation parameter between 17O and 18O	0.5281
Phosphoric-acid temperature	70
